Anesthesiology  
1996; 84:1148-55  
© 1996 American Society of Anesthesiologists, Inc.  
Lippincott-Raven Publishers

## Pentobarbital Enhances Cyclic Adenosine Monophosphate Production in the Brain by Effects on Neurons but Not Glia

Jerry M. Gonzales, M.D.,\* Iris Méndez-Bobé, B.S.†

**Background:** Cyclic adenosine monophosphate (cAMP) is an important regulator of neuronal excitability. The effects of barbiturates on cAMP production in intact neurons are not known. This study used cultures of cortical neurons, cultures of glia, and slices of cerebral cortex from the rat to study the effects of barbiturates on cAMP regulation in the brain.

**Methods:** Primary cultures of cortical neurons or glia were prepared from 17-day gestational Sprague-Dawley rat fetuses and were used after 12–16 days in culture. Cross-cut slices (300  $\mu\text{m}$ ) were prepared from cerebral cortex of adult rats. Cyclic AMP accumulation was determined by measuring the conversion of [ $^3\text{H}$ ]adenosine triphosphate (ATP) to [ $^3\text{H}$ ]cAMP in cells preloaded with [ $^3\text{H}$ ]adenine.

**Results:** Pentobarbital enhanced isoproterenol- and forskolin-stimulated, but not basal, cAMP accumulation in cultures of cerebral neurons. Cyclic AMP production was enhanced by pentobarbital in a dose-dependent fashion up to a concentration of 250  $\mu\text{M}$ ; this concentration of pentobarbital increased cAMP production by 40–50% relative to that in controls without pentobarbital. At 500  $\mu\text{M}$  pentobarbital, the magnitude of the enhancement was less. Pentobarbital had no effect on isoproterenol-stimulated cAMP production in cultures containing only glia. Pentobarbital also enhanced isoproterenol-stimulated, but not basal, cAMP production in slices of cerebral cor-

tex by  $\sim 30\%$  at concentrations of 62.5–250  $\mu\text{M}$  and by almost 100% at 500  $\mu\text{M}$ .

**Conclusions:** Pentobarbital enhances stimulated cAMP accumulation in cultured preparations from brain and fresh cortical slices. Neurons are required for this effect. Because cAMP modulates neuronal excitability, this effect of pentobarbital may be an important mechanism by which this anesthetic influences brain function. (Key words: Anesthetics, intravenous: pentobarbital. Brain, neurons: primary cultured. Brain: glia; slices. Neuronal regulation: adenylyl cyclase, cyclic adenosine monophosphate).

THE mechanisms of action of anesthetic drugs are not well understood at the cellular or molecular levels. Many effects of anesthetics, although, appear to be caused by influences on the regulation of transmembrane signaling and intracellular messengers. Barbiturates, for example, enhance GABA<sub>A</sub>-mediated neuronal inhibition<sup>1–3</sup> and inhibit responses to the excitatory amino acids.<sup>2,4–6</sup> Barbiturates also affect the function of several types of ion channels including the nicotinic acetylcholine receptor,<sup>7,8</sup> calcium channels,<sup>9,10</sup> sodium channels,<sup>11</sup> and the adenosine triphosphate-K<sup>+</sup> channel.<sup>12</sup> Furthermore, barbiturates inhibit protein kinase C<sup>13</sup> and phosphatidylinositol hydrolysis<sup>14,15</sup> and are antagonists at A<sub>1</sub> adenosine receptors.<sup>16</sup> It therefore is apparent that the ultimate effect of barbiturates on neuronal function is an integrated response of the cell in response to many influences.

Adenosine 3',5'-monophosphate (cyclic adenosine monophosphate [cAMP]) is an intracellular messenger that is ubiquitous in the regulation of many aspects of cellular function, including the regulation of neuronal excitability. We have shown previously that anesthetic barbiturates enhance isoproterenol-stimulated cAMP production in intact S49 wild type mouse lymphoma cells,<sup>17</sup> but we observed no effect of barbiturates on adenylyl cyclase activity in homogenates or membrane preparations from S49 cells. However, Dan'ura *et al.*<sup>18–20</sup> have shown that barbiturates inhibit adenylyl cyclase activity stimulated by guanine nucleotide, NaF-

\* Assistant Professor of Anesthesia. Current position: Department of Anesthesiology, Medical College of Pennsylvania and Hahnemann University, Philadelphia, Pennsylvania.

† Research Assistant.

Received from the Department of Anesthesia, University of Pennsylvania, Philadelphia, Pennsylvania. Submitted for publication May 30, 1995. Accepted for publication January 3, 1996. Supported in part by a Research Starter Grant from the Foundation for Anesthesia Education and Research with a grant from Stuart Pharmaceuticals and a Young Investigator Award from the Foundation for Anesthesia Education and Research. Presented in part at the annual meetings of the American Society of Anesthesiologists, Washington, D.C., October 9–13, 1993, and Atlanta, Georgia, October 21–25, 1995, and the Federation of the American Society of Experimental Biologists, Anaheim, California, April 5–9, 1992.

Address reprint requests to Dr. Gonzales: Department of Anesthesiology, Medical College of Pennsylvania and Hahnemann University, Broad and Vine Streets, Mail Stop 310, Philadelphia, Pennsylvania 19102-1192. Address electronic mail to: gonzales@hal.hahnemann.edu.

AlCl<sub>3</sub>, or forskolin in rat brain, although concentrations reported in intact on cAMP accumulation hence, the purpose effects of barbiturates neurons in both from cerebral co

### Materials and

#### Materials

Chemicals used from the following: bital, cytosine, methylxanthine, Dulbecco's modified deoxyethylpiper (DMEM-H) pol Louis, MO; Ha from JRH Biosci from Biocell La

#### Cell Culture

Cultures of c prepared from using protocols Care and Use C vania, as desc hemispheres w solution from Dawley rats. Th ferred saline, th in DMEM-H, w salt solution, Pasteur pipette Ham's F12 med 100  $\mu\text{g} \cdot \text{ml}^{-1}$  s icillin. Cells w per 1.2-cm dia pretreated wit were grown in 5% CO<sub>2</sub> in air, 3 days with fre were treated v furanoside for ation. Glial ce the mixed cul

## PENTOBARBITAL ENHANCES NEURONAL cAMP PRODUCTION

AlCl<sub>3</sub>, or forskolin in preparations of membranes from rat brain, although these effects occurred at higher concentrations than those required for the effects we reported in intact S49 cells. The effects of barbiturates on cAMP accumulation in intact neurons are not known; hence, the purpose of this study was to determine the effects of barbiturates on cAMP production in intact neurons in both cultured preparations and fresh slices from cerebral cortex from the rat.

## Materials and Methods

## Materials

Chemicals used in the current study were obtained from the following sources: isoproterenol, pentobarbital, cytosine- $\beta$ -D-arabino-furanoside, 3-isobutyl-1-methylxanthine (IBMX), Hank's balanced salt solution, Dulbecco's modified Eagle's medium with 25 mM hydroxyethylpiperazineethane sulfonic acid (HEPES) (DMEM-H), poly-D-lysine, and trypsin from Sigma (St. Louis, MO); Ham's F-12 and penicillin/streptomycin from JRH Biosciences (Lenexa, KS); and fetal calf serum from Biocell Laboratories (Rancho Dominguez, CA).

## Cell Culture

Cultures of cerebral cortical neurons and glia were prepared from 17-day gestational Sprague-Dawley rats using protocols approved by the Institutional Animal Care and Use Committee of the University of Pennsylvania, as described previously.<sup>21,22</sup> Whole cerebral hemispheres were collected in Hank's balanced salt solution from fetuses of 17-day gestational Sprague-Dawley rats. They were washed twice in phosphate buffered saline, then digested using trypsin (5 mg  $\cdot$  ml<sup>-1</sup>) in DMEM-H, washed three times in Hank's balanced salt solution, then triturated with a "fire-polished" Pasteur pipette into DMEM-H supplemented with 10% Ham's F12 media, 10% heat inactivated fetal calf serum, 100  $\mu$ g  $\cdot$  ml<sup>-1</sup> streptomycin, and 100 units  $\cdot$  ml<sup>-1</sup> penicillin. Cells were plated at a density of  $4 \times 10^5$  cells per 1.2-cm diameter tissue culture well that had been pretreated with 10  $\mu$ g  $\cdot$  ml<sup>-1</sup> poly-D-lysine. Cultures were grown in a 37°C humidified incubator containing 5% CO<sub>2</sub> in air, and were fed approximately every 2 or 3 days with fresh medium. On day 5, neuronal cultures were treated with 10  $\mu$ g  $\cdot$  ml<sup>-1</sup> cytosine- $\beta$ -D-arabino-furanoside for 24 h to stop nonneuronal cell proliferation. Glial cell cultures were prepared by dispersing the mixed cultures by digestion with trypsin at day 5

and replating them at a density of  $8 \times 10^4$  cells per 1.2-cm diameter well. These cultures were also fed every 2 or 3 days but were not treated with cytosine- $\beta$ -D-arabino-furanoside. This procedure resulted in preparations that were essentially devoid of neuronal cells. For both types of cultures, feedings after day 5 were with the aforementioned media, with the exception of Ham's F-12, which was removed to exclude glutamate from the feeding. Cultures were used for experiments after 12–16 days in culture.

## Slice Preparation

The brains of female Sprague-Dawley rats (mothers of fetuses used for preparations of primary cultures) were removed after anesthesia with carbon dioxide and death by decapitation. The brains were rinsed in ice-cold DMEM-H that was previously equilibrated with 95% O<sub>2</sub>/5% CO<sub>2</sub> and the cerebral cortex was dissected and prepared as 300  $\mu$ m cross-cut slices using a McIlwain tissue chopper (Mickle, Gomshall, Surrey, England) as has been described by others.<sup>22</sup> Slices were dispersed in fresh, ice-cold DMEM-H that was previously equilibrated with 95% O<sub>2</sub>/5% CO<sub>2</sub>.

## Measurement of Cyclic Adenosine Monophosphate Accumulation

Cyclic AMP accumulation in cultured cells was determined in cells preloaded with radiolabeled adenine as described by Atkinson and Minneman.<sup>22</sup> Neuronal cultures were incubated with 0.5  $\mu$ Ci [2,8-<sup>3</sup>H]adenine in 0.5 ml growth media for 120 min at 37°C, then washed twice with serum-free DMEM-H. When included, IBMX (0.5 mM) and pentobarbital were added to the cultures in a final reaction volume of 0.5 ml for a 20-min preincubation period. Cyclic AMP accumulation was initiated by the addition of control vehicle or medium containing isoproterenol, clonidine, or forskolin. The reaction was stopped after 10 min by the addition of trichloroacetic acid for a final concentration of 5% in a final volume of 1.0 ml. The contents of the wells were collected into glass tubes, samples were centrifuged at 500g for 10 min after which the [<sup>3</sup>H]cAMP and [<sup>3</sup>H]adenosine triphosphate were isolated by sequential chromatography over Dowex and alumina columns as described previously.<sup>17</sup> Cyclic AMP accumulation was calculated as the percentage of [<sup>3</sup>H]adenosine triphosphate initially present in the cultures that was converted to [<sup>3</sup>H]cAMP. Cyclic AMP production was linear up to at least 20 min in this model (data not shown).



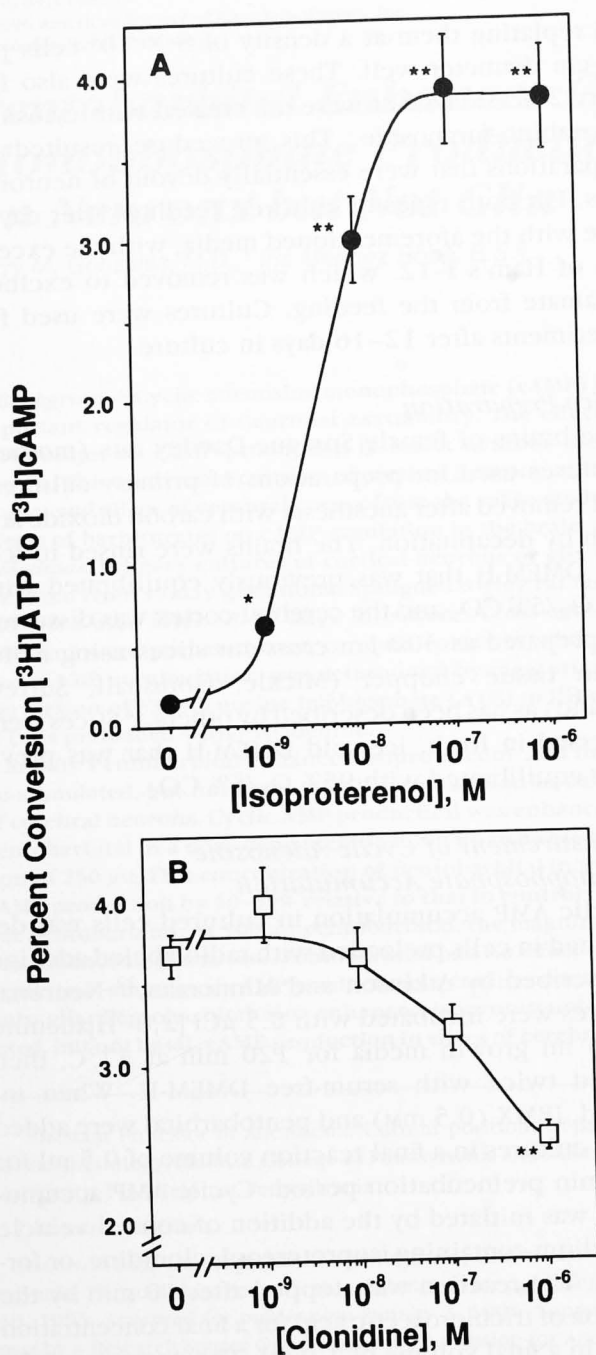

Measurement of cAMP accumulation in slices was determined in cells preloaded with radiolabeled adenine as described by Atkinson and Minneman.<sup>22</sup> Buffer was decanted from the slices prepared as described earlier and the tissue was incubated in fresh DMEM-H that was previously equilibrated with 95% O<sub>2</sub>/5% CO<sub>2</sub> and containing 1.0  $\mu$ Ci [2,8-<sup>3</sup>H]adenine per milliliter for 120 min at 37°C while being bubbled with 95% O<sub>2</sub>/5%

Fig. 1. Effect of stimulatory and inhibitory agonists on cyclic adenosine monophosphate accumulation in cultures of cortical neurons. Cultures were exposed to 0.5 mM 3-isobutyl-1-methylxanthine for a 20 min preincubation period before the addition of agonist. (A) Increasing concentrations of isoproterenol were added to cultures to stimulate the production of cyclic adenosine monophosphate. Data are presented as the percentage of [<sup>3</sup>H]adenosine triphosphate that was converted to [<sup>3</sup>H]cyclic adenosine monophosphate and represent the mean  $\pm$  SEM values for four experiments. Where error bars are not seen, the variance is less than the dimension of the symbol for the data point. \* $P$  < 0.05 and \*\* $P$  < 0.01 compared to the value in the absence of isoproterenol by analysis of variance and Dunnett's *post hoc* correction. (B) Increasing concentrations of clonidine were added to cultures to inhibit forskolin-stimulated (5  $\mu$ M) cyclic adenosine monophosphate production. Data are presented as above in (A) for four experiments. \*\* $P$  < 0.01 compared to value in the absence of clonidine by analysis of variance and Dunnett's *post hoc* correction.

CO<sub>2</sub>, then washed twice with DMEM-H. Aliquots of slices containing approximately 25 mg wet weight of brain tissue were transferred into reaction tubes containing 0.5 mM IBMX and pentobarbital in a final reaction volume of 0.5 ml for a 20-min preincubation period. The reactions were performed and the samples were analyzed as described earlier for cultured cells.

#### Data Analysis

Data from each type of experiment were analyzed using a paired Student's *t* test, one-sample *t* test with correction for multiple comparisons, or analysis of variance with *post hoc* corrections using Dunnett's test, as indicated in the figure legends. A value of  $P$  < 0.05 was considered significant.

#### Results

Before beginning experiments with pentobarbital, the function of receptor-modulated cAMP production by both stimulatory and inhibitory G-protein-linked pathways was tested in cultured neurons. The  $\beta$ -adrenergic agonist, isoproterenol, significantly stimulated cAMP production in cultures of neurons, with a maximal increase of approximately tenfold over basal at concentrations of 0.1 and 1  $\mu$ M (fig. 1A). The  $\alpha_2$ -adrenergic agonist, clonidine, inhibited forskolin-stimulated cAMP production by  $\sim$ 30% at a concentration of 1  $\mu$ M (fig. 1B).

The effect of pentobarbital on cAMP accumulation was tested in these cultures. Isoproterenol (1  $\mu$ M), as

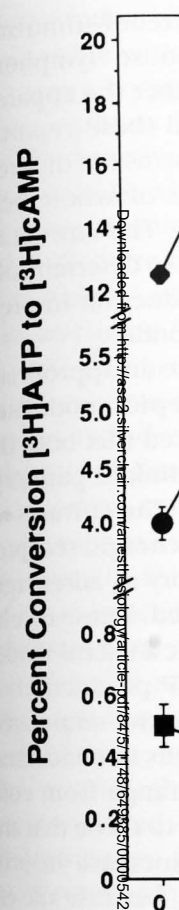

Fig. 2. Effect of pentobarbital on isoproterenol-stimulated cyclic adenosine monophosphate accumulation in cortical neurons. Slices were preincubated with 0.5 mM 3-isobutyl-1-methylxanthine for a 20 min preincubation period before the addition of isoproterenol (1  $\mu$ M). Data are presented as the mean  $\pm$  SEM values for four experiments. \*\* $P$  < 0.01 compared to value in the absence of isoproterenol by analysis of variance and Dunnett's *post hoc* correction.

demonstrated earlier, significantly stimulated cAMP production in these preparations (fig. 2). Cyclic AMP production by isoproterenol and forskolin was inhibited by pentobarbital in a dose-dependent manner. The magnitude of the inhibition was dependent on the concentration of pentobarbital and the magnitude of the stimulation by the agonist. In experiments performed

## PENTOBARBITAL ENHANCES NEURONAL cAMP PRODUCTION

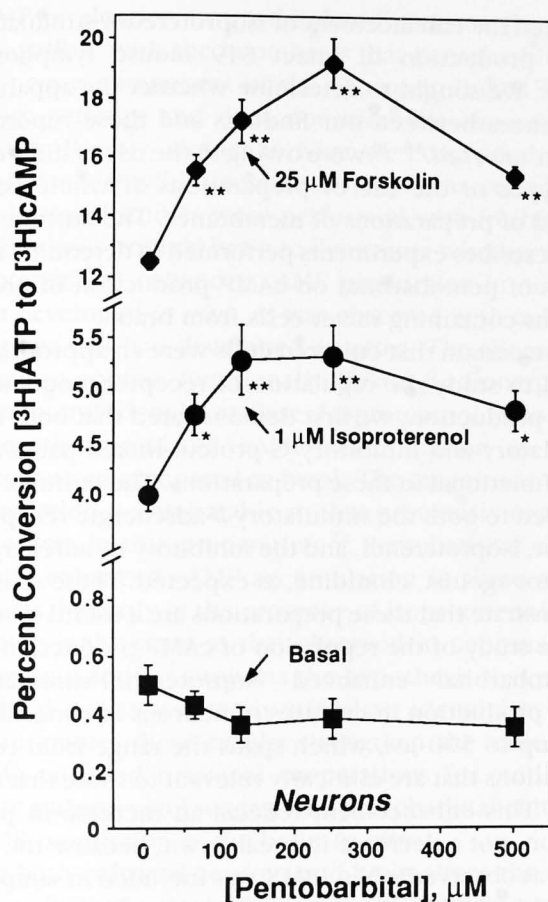

Fig. 2. Effect of pentobarbital on basal (unstimulated), isoproterenol-stimulated (1  $\mu\text{M}$ ) and forskolin-stimulated (25  $\mu\text{M}$ ) cyclic adenosine monophosphate accumulation in cultures of cortical neurons. Samples were exposed to 0.5 mM 3-isobutyl-1-methylxanthine and the indicated concentration of pentobarbital for a 20 min preincubation period before the addition of isoproterenol or forskolin. Results are presented as the mean  $\pm$  SEM values for 8–12 experiments. \* $P < 0.05$  and \*\* $P < 0.01$  compared to the value in the presence of isoproterenol or forskolin, but in the absence of pentobarbital by analysis of variance and *post hoc* test using the Dunnett's test.

demonstrated earlier, and forskolin (25  $\mu\text{M}$ ) significantly stimulated cAMP production compared to basal cAMP production. Pentobarbital enhanced isoproterenol- and forskolin-stimulated cAMP production in these preparations with a biphasic dose-response curve (fig. 2). Cyclic AMP production was enhanced by pentobarbital in a dose-dependent fashion up to a concentration of 250  $\mu\text{M}$ ; This concentration increased cAMP production by 40–50% relative to that in controls without pentobarbital. At 500  $\mu\text{M}$  pentobarbital, the magnitude of the enhancement was less. Similar experiments performed in the presence of isoproterenol

but in the absence of IBMX showed a similar response but the signal was smaller (data not shown).

To determine whether the effect of pentobarbital required neurons, experiments were performed with cultures of glia. Isoproterenol significantly stimulated cAMP production, compared to basal, at concentrations of 5 nM and 1  $\mu\text{M}$  (data not shown). Cyclic AMP production stimulated by 1  $\mu\text{M}$  isoproterenol was greater in these preparations than in cultures of neurons. Pentobarbital had no effect on cAMP production in the presence of either concentration of isoproterenol (fig. 3).

Experiments were performed with slices prepared from cerebral cortices of adult Sprague-Dawley rats to determine whether or not pentobarbital enhanced cAMP production in neurons that had developed *in vivo* as well as those that had developed in culture. Cyclic AMP production in these preparations was significantly stimulated by isoproterenol (fig. 4). Pentobarbital enhanced isoproterenol-stimulated cAMP production by  $\sim 30\%$  at concentrations of 62.5, 125, and 250  $\mu\text{M}$ , and by nearly 100% at a concentration of 500

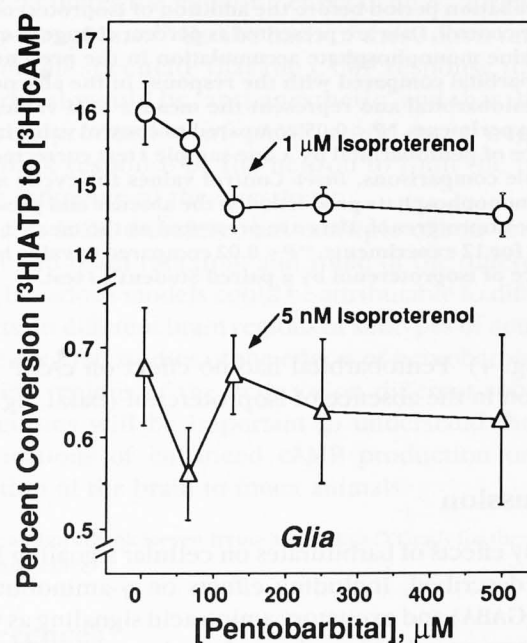

Fig. 3. Effect of pentobarbital on isoproterenol-stimulated (5 nM and 1  $\mu\text{M}$ ) cyclic adenosine monophosphate accumulation in cultures of cortical glia. Samples were exposed to 0.5 mM 3-isobutyl-1-methylxanthine and the indicated concentration of pentobarbital for a 20-min preincubation period before the addition of isoproterenol. Results are presented as the mean  $\pm$  SEM values for 7–9 experiments.



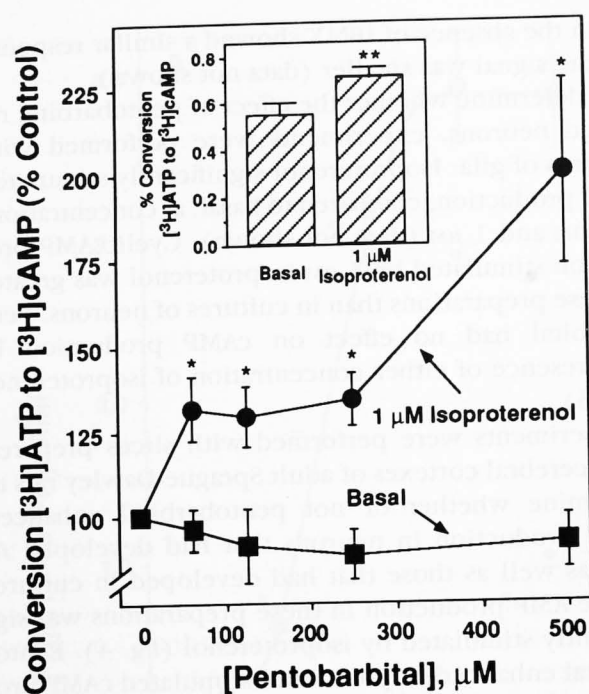

Fig. 4. Effect of pentobarbital on cyclic adenosine monophosphate accumulation in the presence and absence (basal) of 1  $\mu\text{M}$  isoproterenol-stimulated in cortical slices from rat brain. Samples were exposed to 0.5 mM 3-isobutyl-1-methylxanthine and the indicated concentration of pentobarbital for a 20-min preincubation period before the addition of isoproterenol or vehicle control. Data are presented as percent change in cyclic adenosine monophosphate accumulation in the presence of the pentobarbital and represent the mean  $\pm$  SEM values for 8–12 experiments. \* $P < 0.05$  compared to control value in the absence of pentobarbital by a one-sample  $t$  test corrected for multiple comparisons. Inset: Control values for cyclic adenosine monophosphate production in the absence and presence of 1  $\mu\text{M}$  isoproterenol. Data are presented as the mean  $\pm$  SEM values for 12 experiments. \*\* $P < 0.02$  compared to value in the absence of isoproterenol by a paired Student's  $t$  test.

$\mu\text{M}$  (fig. 4). Pentobarbital had no effect on cAMP production in the absence of isoproterenol (basal, fig. 4).

## Discussion

Many effects of barbiturates on cellular signaling have been described, including effects on  $\gamma$ -aminobutyric acid (GABA) and excitatory amino acid signaling as well as effects on other ion channels and enzymes. The reported effects on cAMP production have been variable. Dan'ura *et al.*<sup>18–20</sup> reported that barbiturates inhibit cAMP production stimulated by forskolin, 5'-guanylimidodiphosphate (Gpp[NH]p), or NaF-AlCl<sub>3</sub> in membranes prepared from rat brain. However, we previously

reported the enhancement of isoproterenol-stimulated cAMP production in intact S49 mouse lymphoma cells.<sup>17</sup> We sought to determine whether the apparent differences between our findings and those reported by Dan'ura *et al.*<sup>18–20</sup> were owing to the use of different cell types or the use of preparations of whole cells instead of preparations of membranes. The current report describes experiments performed to determine the effects of pentobarbital on cAMP production in preparations containing intact cells from brain.

To be certain that cultured cells were an appropriate model to study the regulation of receptor-modulated cAMP production, we first demonstrated that both the stimulatory and inhibitory G-protein-linked pathways were functional in these preparations. The cultures responded to both the stimulatory  $\beta$ -adrenergic receptor agonist, isoproterenol, and the inhibitory  $\alpha_2$ -adrenergic receptor agonist, clonidine, as expected. These results demonstrate that these preparations are a useful model for the study of the regulation of cAMP production.

Pentobarbital enhanced isoproterenol-stimulated cAMP production in cultures of neurons at concentrations up to 500  $\mu\text{M}$ , which spans the range from concentrations that are clinically relevant to those that are toxic. This enhancement reflects an increase in production, not a decrease in breakdown, because the effect was observed when IBMX was included in samples to inhibit phosphodiesterase activity, but IBMX was not required for the effect. Although these cultures predominantly contain neurons, some glia are present in these preparations to support the growth of the neurons. Based only on the data from these preparations, we could not rule out that the effect of pentobarbital is occurring in the glia, and because glia do contribute to the regulation of excitatory neurotransmission,<sup>23</sup> it is important to make this distinction. When cultures are dispersed and replated, essentially only glia grow, neurons do not survive this manipulation, as we<sup>21</sup> and others<sup>22</sup> have described. When cAMP production stimulated by 5 nM or 1  $\mu\text{M}$  isoproterenol was measured in these preparations, pentobarbital had no effect. The production of cAMP by glia stimulated by 1  $\mu\text{M}$  isoproterenol was much greater than that observed in preparations of neurons stimulated by 1  $\mu\text{M}$  isoproterenol but was similar to that in neurons stimulated by 25  $\mu\text{M}$  forskolin. These data suggest that the lack of effect of pentobarbital on glial preparations is not due to the absolute level of activity observed in the absence of pentobarbital, but rather that neurons are required for the effect. The lack of an effect of pentobarbital on

cAMP production in compatible with the influences a component of the regulatory pathway and moiety directly, simultaneously for S49 wild type. Additional studies prepared slices from rat pentobarbital enhanced that developed *in vivo* neurons that had been found to contain functional receptors and adenylyl significantly stimulated preparations compared stimulation is compared by others in this preparation. Pentobarbital enhanced cAMP production, but only in finding is the same structures, and further studies barbitals does not decrease. Furthermore, these using cultured neurons these pathways and cAMP production in. In both cultured neurons, the effect of pentobarbital on cAMP production. In preparation, the effect is not caused by the experimental conditions. The magnitude of the effect is greater in some subpopulations of cells, but the effect on cellular cAMP production may be quite significant. Many investigators can play a role in neurotransmission or neurotransmission. Acetylcholine increases the frequency of action potentials in rat cerebellar granule cells, a mechanism that involves cAMP.<sup>24</sup> Analogs of cAMP in Purkinje neurons currents are potent modulators of cAMP kinase in cerebellar granule cells. Tyrosine kinase in cerebellar granule cells in cerebellar cortex neurons.<sup>28</sup> Activated

## PENTOBARBITAL ENHANCES NEURONAL cAMP PRODUCTION

cAMP production in unstimulated neurons (basal) is compatible with the hypothesis that pentobarbital influences a component of the G-protein-linked stimulatory pathway and does not stimulate the catalytic moiety directly, similar to what we concluded previously for S49 wild type mouse lymphoma cells.<sup>17</sup>

Additional studies were performed with freshly prepared slices from rat brain to determine whether or not pentobarbital enhanced cAMP production in neurons that developed *in vivo*, as was observed with cultured neurons that had developed *in vitro*. The slices were found to contain functionally linked  $\beta$ -adrenergic receptors and adenylyl cyclase. Isoproterenol ( $1 \mu\text{M}$ ) significantly stimulated cAMP accumulation in these preparations compared to basal. The magnitude of the stimulation is comparable to that previously reported by others in this preparation.<sup>22</sup> Pentobarbital significantly enhanced cAMP accumulation in these preparations, but only in the presence of isoproterenol. This finding is the same as that observed in neuronal cultures, and further supports the hypothesis that pentobarbital does not directly stimulate adenylyl cyclase. Furthermore, these results strengthen the validity of using cultured neuronal preparations for studies of these pathways and suggest that pentobarbital enhances cAMP production in the brain *in situ*.

In both cultured neurons and brain slices the maximum effect of pentobarbital was a 30–50% increase in cAMP production. This measurement is an overall average increase in production in the entire sample. Because the effect is not seen in all cells, as demonstrated by the experiments with glial cultures, it is likely that the magnitude of the effect of pentobarbital is much greater in some subpopulation of cells, and therefore, the effect on cellular function would be expected to be quite significant in this group of cells.

Many investigators have demonstrated that cAMP can play a role in the depression of excitatory neurotransmission or enhancement of inhibitory neurotransmission. Activation of  $\beta$ -adrenergic receptors increases the frequency of inhibitory synaptic currents in rat cerebellar stellate and Purkinje cells, by a mechanism that probably involves intracellular cAMP.<sup>24</sup> Analogs of cAMP inhibit spontaneous firing of Purkinje neurons.<sup>25</sup>  $\gamma$ -Aminobutyric acid-mediated currents are potentiated by cAMP-dependent protein kinase in cerebellar Purkinje cells.<sup>26,27</sup>  $\gamma$ -Aminobutyric acid-mediated currents are potentiated by cAMP in cerebrocortical, cerebellar, and hypothalamic neurons.<sup>28</sup> Activation of  $\beta$ -adrenergic receptors leads

to a reduced frequency of spontaneous excitatory spikes and a hyperpolarization of Purkinje cells.<sup>29</sup> Phosphorylation of inhibitory glycine channels expressed in xenopus oocytes by cAMP-dependent protein kinase results in an enhancement of glycine-evoked current.<sup>30,31</sup> Isoproterenol enhanced the inhibitory responses to GABA, mimicking the effect of benzodiazepines in neurons from the lateral hypothalamus.<sup>32</sup> Norepinephrine activation of  $\beta$ -adrenergic receptors enhanced GABA-activated inhibitory synaptic mechanisms in the cerebellum and cerebral cortex.<sup>33</sup> Enhancement of neurotransmitter-stimulated cAMP production by pentobarbital may, therefore, play a role in the depression of excitatory neurotransmission or enhancement of inhibitory neurotransmission by one or more of these mechanisms.

However, several other investigators have demonstrated an excitatory effect of cAMP on neuronal activity. Cyclic AMP or cAMP-dependent kinase enhanced responses to excitatory amino acids in several experimental models.<sup>29,34–39</sup> Cyclic AMP also has been shown to decrease the inhibitory response to GABA.<sup>40–44</sup> It also appears that in one specific brain region, the locus ceruleus, inhibition of adenylyl cyclase mediates the hypnotic effect of an  $\alpha_2$ -adrenergic receptor agonist.<sup>45</sup> On the basis of these observations, one might speculate that the cAMP response to pentobarbital would be 'anti-anesthetic' and that the enhanced production of cAMP could be a negative feedback response by the neuron to limit the inhibitory influence of the anesthetic.

Cyclic AMP, therefore, has multiple effects on neuronal and brain function, and some of the differences seen in various models could be attributable to different effects on different brain regions or subtypes of neurons. More detailed studies of the effects of pentobarbital on specific regions of the brain or on different subtypes of neurons will be important to understand the full implications of enhanced cAMP production on the function of the brain in intact animals.

The authors thank Steven Irvine and Judith O'Grady for their technical assistance.

## References

1. Nicoll RA, Eccles JC, Oshima T, Rubia F: Prolongation of hippocampal inhibitory postsynaptic potentials by barbiturates. *Nature* 1975; 258:625–7
2. Barker JL, Ransom BR: Pentobarbitone pharmacology of mammalian central neurones grown in tissue culture. *J Physiol (Lond)* 1978; 280:355–72



3. Olsen RW, Sapp DM, Bureau MH, Turner DM, Kokka N: Allosteric actions of central nervous system depressants including anesthetics on subtypes of the inhibitory gamma-aminobutyric acid<sub>A</sub> receptor-chloride channel complex. *Ann NY Acad Sci* 1991; 625:145-54
4. Bowery NG, Dray A: Reversal of the action of amino acid antagonists by barbiturates and other hypnotic drugs. *Br J Pharmacol* 1978; 63:197-215
5. Lodge D, Johnson KM: Noncompetitive excitatory amino acid receptor antagonists. *Trends Pharmacol Sci* 1990; 11:81-6
6. Weight FF, Lovinger DM, White G, Peoples RW: Alcohol and anesthetic actions on excitatory amino acid-activated ion channels. *Ann NY Acad Sci* 1991; 625:97-107
7. Dodson BA, Braswell LM, Miller KW: Barbiturates bind to an allosteric regulatory site on nicotinic acetylcholine receptor-rich membranes. *Mol Pharmacol* 1987; 32:119-26
8. Jacobson I, Pocock G, Richards CD: Effects of pentobarbital on the properties of nicotinic channels of chromaffin cells. *Eur J Pharmacol* 1991; 202:331-9
9. Heyer EJ, MacDonald RL: Barbiturate reduction of calcium-dependent action potentials: Correlation with anesthetic action. *Brain Res* 1982; 236:157-71
10. Gross RA, MacDonald RL: Differential actions of pentobarbital on calcium current components of mouse sensory neurones in culture. *J Physiol (Lond)* 1988; 405:187-203
11. Frenkel C, Duch DS, Urban BW: Molecular actions of pentobarbital isomers on sodium channels from human brain cortex. *ANESTHESIOLOGY* 1990; 72:640-9
12. Kozłowski RZ, Ashford ML: Barbiturates inhibit ATP-K<sup>+</sup> channels and voltage-activated currents in CRI-G1 insulin-secreting cells. *Br J Pharmacol* 1991; 103:2021-9
13. Deshmukh DS, Kuizon S, Chauhan VPS, Brockerhoff H: Effect of barbiturates on polyphosphoinositide biosynthesis and protein kinase C activity in synaptosomes. *Neuropharmacology* 1989; 28:1317-23
14. Hasséssian H, Prat A, Couture R: Anaesthetic doses of pentobarbital antagonize phosphatidylinositol hydrolysis induced by substance P or carbachol in the spinal cord and cerebral cortex of the rat. *Eur J Pharmacol* 1992; 227:103-7
15. Robinson-White AJ, Muldoon SM, Elson L, Collado-Escobar DM: Evidence that barbiturates inhibit antigen-induced responses through interactions with a GTP-binding protein in rat basophilic leukemia (RBL-2H3) cells. *ANESTHESIOLOGY* 1990; 72:996-1004
16. Lohse MJ, Klotz K-N, Jakobs KH, Schwabe U: Barbiturates are selective antagonists at A<sub>1</sub> adenosine receptors. *J Neurochem* 1985; 45:1761-70
17. Gonzales JM: Anesthetic barbiturates enhance G<sub>sa</sub>-dependent cAMP accumulation in S49 mouse lymphoma cells. *J Neurochem* 1995; 64:2559-66
18. Dan'ura T, Kurokawa T, Yamashita A, Yanagiuchi H, Ishibashi S: Relationship between the inhibition of adenylate cyclase by pentobarbital and the functional coupling of N<sub>2</sub> and the catalytic unit. *Biochem Biophys Res Commun* 1986; 140:237-42
19. Dan'ura T, Kurokawa T, Yamashita A, Higashi K, Ishibashi S: Inhibition of brain adenylate cyclase by barbiturates through the effect on the interaction between guanine nucleotide-binding stimulatory regulatory protein and catalytic unit. *J Pharmacobiodyn* 1987; 10:98-103
20. Dan'ura T, Kurokawa T, Yamashita A, Ishibashi S: Effective inhibition by pentobarbital of forskolin-stimulated adenylate cyclase activity in rat brain. *Chem Pharm Bull (Tokyo)* 1989; 37:3142-4
21. Gonzales JM, Loeb AL, Reichard PS, Irvine S: Ketamine inhibits glutamate-, N-methyl-D-aspartate, and quisqualate-stimulated cGMP production in cultured cerebral neurons. *ANESTHESIOLOGY* 1995; 82:205-13
22. Atkinson BN, Minneman KP: Multiple adrenergic receptor subtypes controlling cyclic AMP formation: Comparison of brain slices and primary neuronal and glial cultures. *J Neurochem* 1991; 56:587-95
23. Mennerick S, Zorumski CF: Glial contributions to excitatory neurotransmission in cultured hippocampal cells. *Nature* 1994; 368:59-62
24. Llano I, Gerschenfeld HM: Beta-adrenergic enhancement of inhibitory synaptic activity in rat cerebellar stellate and Purkinje cells. *J Physiol (Lond)* 1993; 468:201-24
25. Siggins GR, Henriksen SJ: Analogs of cyclic adenosine monophosphate: Correlation of inhibition of Purkinje neurons with protein kinase activation. *Science* 1975; 189:559-61
26. Kano M, Konnerth A: Potentiation of GABA-mediated currents by cAMP-dependent protein kinase. *Neuroreport* 1992; 3:563-6
27. Cheun JE, Yeh HH: Modulation of GABA<sub>A</sub> receptor-activated current by norepinephrine in cerebellar Purkinje cells. *Neuroscience* 1992; 51:951-60
28. Sessler FM, Mouradian RD, Cheng J-T, Yeh HH, Liu W, Waterhouse BD: Noradrenergic potentiation of cerebellar Purkinje cell responses to GABA: Evidence for mediation through the  $\beta$ -adrenoceptor-coupled cyclic AMP system. *Brain Res* 1989; 499:27-38
29. Mori-Okamoto J, Tatsuno J: Effects of noradrenaline on the responsiveness of cultured cerebellar neurons to excitatory amino acids. *Brain Res* 1988; 448:259-71
30. Song YM, Huang LY: Modulation of glycine receptor chloride channels by cAMP-dependent protein kinase in spinal trigeminal neurons. *Nature* 1990; 348:242-5
31. Vaello ML, Ruiz-Gomez A, Lerma J, Mayor F Jr: Modulation of inhibitory glycine receptors by phosphorylation by protein kinase C and cAMP-dependent protein kinase. *J Biol Chem* 1994; 269:2002-8
32. Cheng JT, Sessler FM, Azizi SA, Chapin JK, Waterhouse BD: Electrophysiological actions of norepinephrine in rat lateral hypothalamus. II. An in vitro study of the effects of iontophoretically applied norepinephrine on LH neuronal responses to gamma-aminobutyric acid (GABA). *Brain Res* 1988; 446:90-105
33. Waterhouse BD, Moises HC, Yeh HH, Woodward DJ: Norepinephrine enhancement of inhibitory synaptic mechanisms in cerebellum and cerebral cortex: Mediation by  $\beta$  adrenergic receptors. *J Pharmacol Exp Ther* 1982; 221:495-506
34. Cerne R, Rusin KI, Randic M: Enhancement of the N-methyl-D-aspartate response in spinal dorsal horn neurons by cAMP-dependent protein kinase. *Neurosci Lett* 1993; 161:124-8
35. Gean PW, Huang C-C, Lin J-H, Tsai J-J: Sustained enhancement of NMDA receptor-mediated synaptic potential by isoproterenol in rat amygdalar slices. *Brain Res* 1992; 594:331-4
36. Mori-Okamoto J, Tatsuno J: Participation of cyclic adenosine monophosphate and  $\beta$ -adrenergic receptors in the facilitatory effect of noradrenaline on the response of cultured cerebellar neurons to glutamate. *Brain Res* 1989; 490:64-72
37. Greengard P, Jen J, Nairn AC, Stevens CF: Enhancement of the glutamate response by cAMP in cerebellar neurons. *Science* 1990; 250:1132-5
38. Wang L-Y, Salter DW: Enhancement of NMDA receptor currents by cAMP-dependent protein kinase. *Neuron* 1991; 6:1132-5
39. Keller BU, Hollman J: Regulation of NMDA receptor currents by cAMP-dependent protein kinase. *Neuron* 1991; 6:1132-5
40. Porter NM, Twyman RJ: Regulation of NMDA receptor currents by cAMP-dependent protein kinase. *Neuron* 1991; 6:1132-5
41. Moss SJ, Smart TG: Regulation of NMDA receptor currents by cAMP-dependent protein kinase. *Neuron* 1991; 6:1132-5

## PENTOBARBITAL ENHANCES NEURONAL cAMP PRODUCTION

- in Bull (Tokyo) 1989; 37:
- Irvine S: Ketamine inhibits quisqualate-stimulated cGMP. ANESTHESIOLOGY 1995; 82:
- Multiple adrenergic receptor: Comparison of brain slices. J Neurochem 1991; 56:
- Contributions to excitatory cells. Nature 1994; 368:
- Adrenergic enhancement of stellate and Purkinje cells.
- of cyclic adenosine mono- Purkinje neurons with protein 9-61
- on of GABA-mediated cur- use. Neuroreport 1992; 3:
- of GABA<sub>A</sub> receptor-activated Purkinje cells. Neuroscience
- J-T, Yeh HH, Liu W, Water- cerebellar Purkinje cell re- through the  $\beta$ -adrenoceptor. 1989; 499:27-38
- ts of noradrenaline on the neurons to excitatory amino
- of glycine receptor chloride kinase in spinal trigeminal
- J, Mayor F Jr: Modulation of rylation by protein kinase C. ol Chem 1994; 269:2002-
- A, Chapin JK, Waterhouse repinephrine in rat lateral of the effects of iontopho- LH neuronal responses to in Res 1988; 446:90-105
- HH, Woodward DJ: Norepi- naptic mechanisms in cere- y  $\beta$  adrenergic receptors. 506
- ancement of the *N*-methyl- orn neurons by cAMP-depen- 6; 161:124-8
- ii J-J: Sustained enhancement potential by isoproterenol in 94:331-4
- icipation of cyclic adenosine ctors in the facilitatory effect ltured cerebellar neurons to
- vens CF: Enhancement of the
- glutamate response by cAMP-dependent protein kinase in hippocam- pal neurons. Science 1991; 253:1135-8
38. Wang L-Y, Salter MW, MacDonald JF: Regulation of kainate receptors by cAMP-dependent protein kinase and phosphatases. Sci- ence 1991; 253:1132-5
39. Keller BU, Hollman M, Heinemann S, Konnerth A: Calcium influx through subunits GluR1/GluR3 of kainate/AMPA receptor channels is regulated by cAMP dependent protein kinase. EMBO Journal 1992; 11:891-6
40. Porter NM, Twyman RE, Uhler MD, Macdonald RL: Cyclic AMP- dependent protein kinase decreases GABA<sub>A</sub> receptor current in mouse spinal neurons. Neuron 1990; 5:789-96
41. Moss SJ, Smart TG, Blackstone CD, Huganir RL: Functional modulation of GABA<sub>A</sub> receptors by cAMP-dependent protein phos- phosphorylation. Science 1992; 257:661-5
43. Schwartz RD, Heuschneider G, Edgar PP, Cohn JA: cAMP an- alogs inhibit  $\gamma$ -aminobutyric acid-gated chloride flux and activate protein kinase A in brain synaptoneuroosomes. Mol Pharmacol 1991; 39:370-5
44. Heuschneider G, Schwartz RD: cAMP and forskolin decrease gamma-aminobutyric acid-gated chloride flux in rat brain synapto- neurosomes. Proc Natl Acad Sci USA 1989; 86:2938-42
45. Correa-Sales C, Nacif-Coelho C, Reid K, Maze M: Inhibition of adenylate cyclase in the locus coeruleus mediates the hypnotic response to an  $\alpha$ ph<sub>2</sub> agonist in the rat. J Pharmacol Exp Ther 1992; 263:1046-9
